# Supplementary material for: HOXC8 regulates self-renewal, differentiation and transformation of breast cancer stem cells
Source: Springer Nature journal article supplement (doi:10.1186/s12943-017-0605-z), 2017-02-16

**A**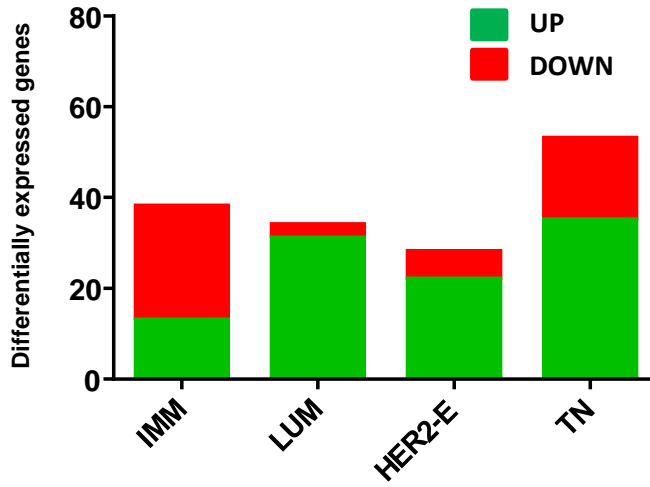**B****DOWNREGULATED GENES****UPREGULATED GENES**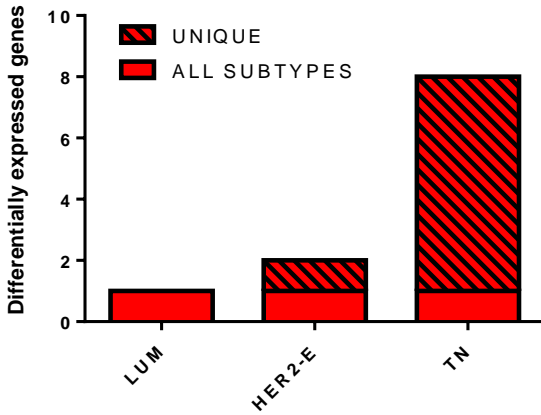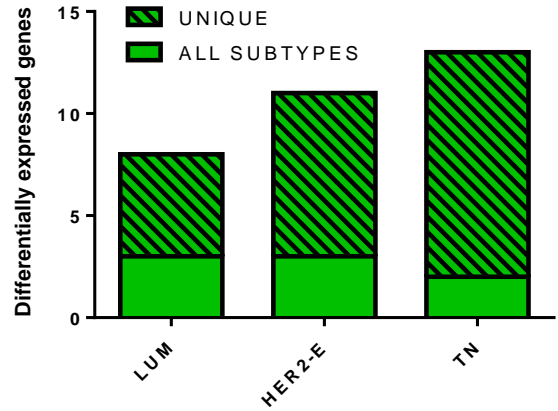**C****DOWNREGULATED GENES****UPREGULATED GENES**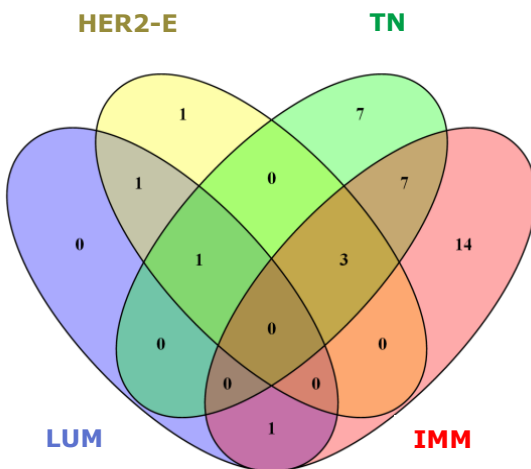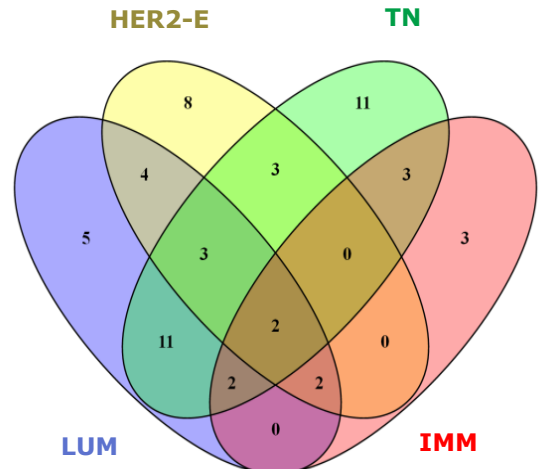

Supplement: MOESM2 [file 12072038]
