# Supplementary material for: HOXC8 regulates self-renewal, differentiation and transformation of breast cancer stem cells
Source: Springer Nature journal article supplement (doi:10.1186/s12943-017-0605-z), 2017-02-16

HMEC

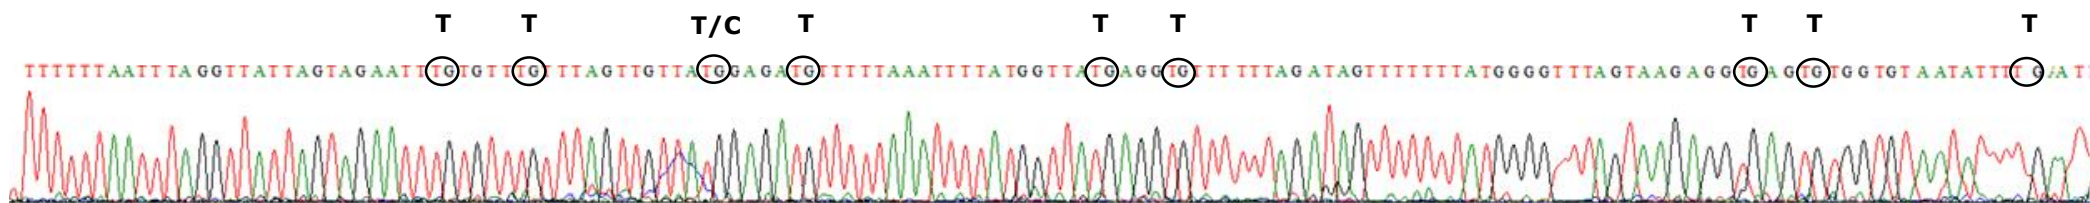

BT549

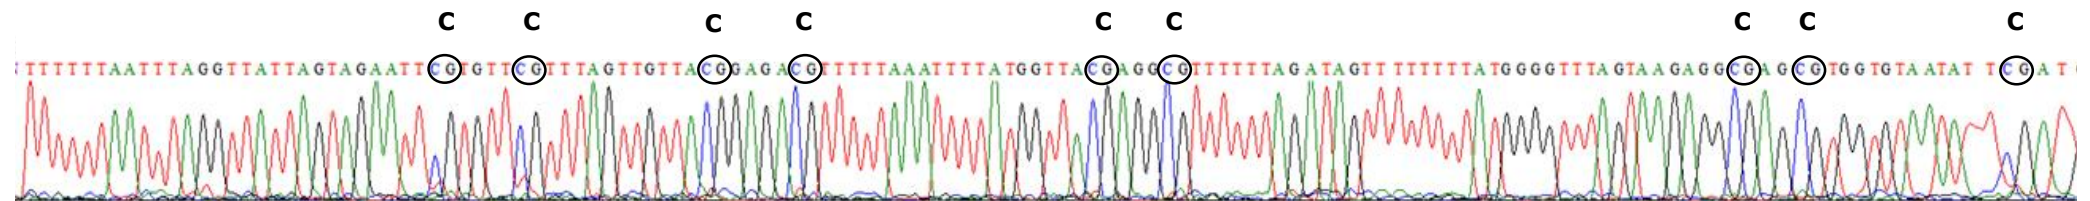

MDA-MB-231

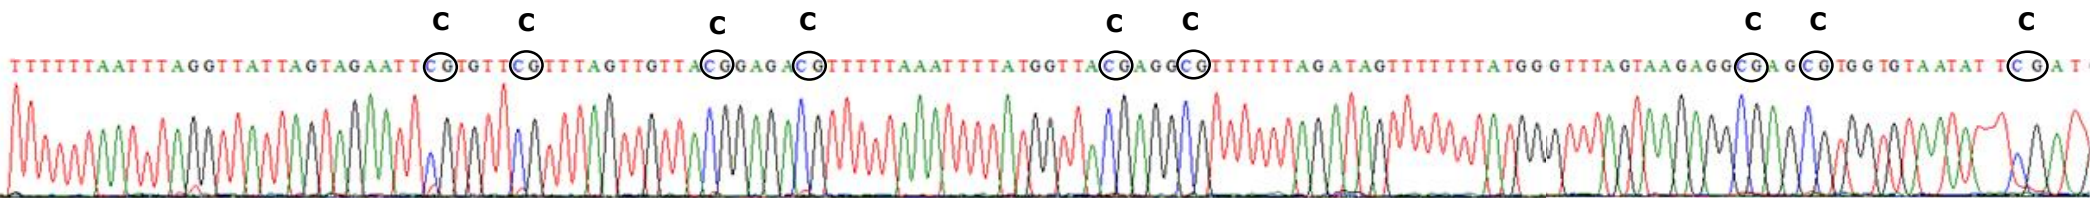

MDA-MB-468

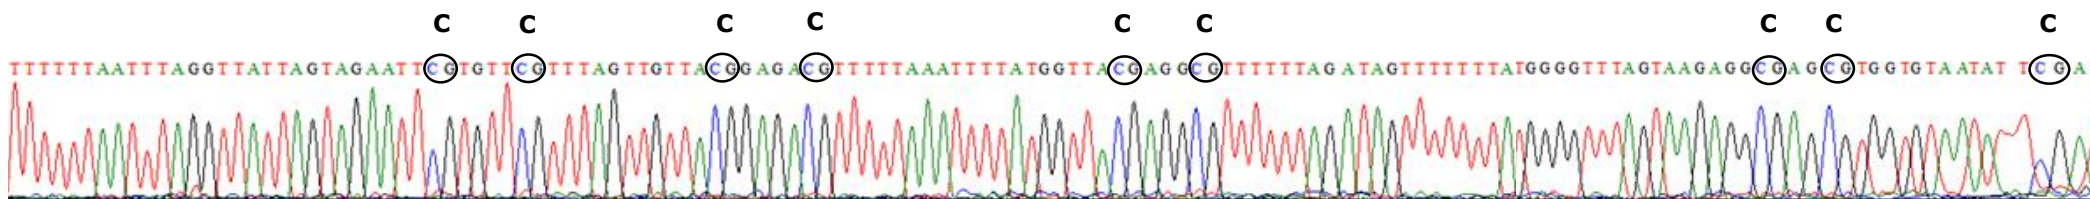

Supplement: MOESM5 [file 12072038]
