# Supplementary material for: HOXC8 regulates self-renewal, differentiation and transformation of breast cancer stem cells
Source: Springer Nature journal article supplement (doi:10.1186/s12943-017-0605-z), 2017-02-16

**HOXC8-day 4**

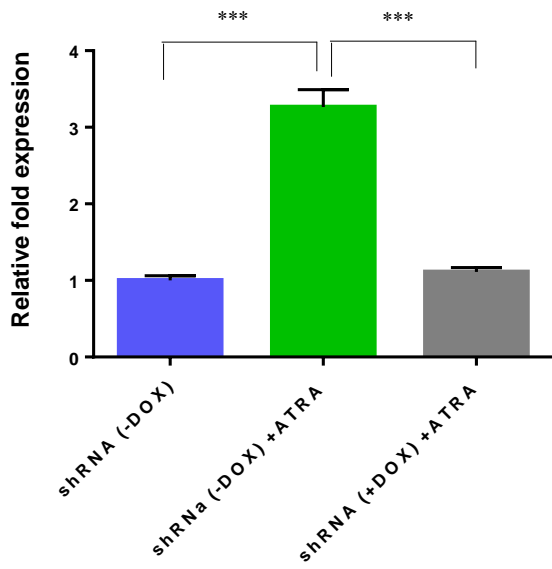

**HOXC8-day 7**

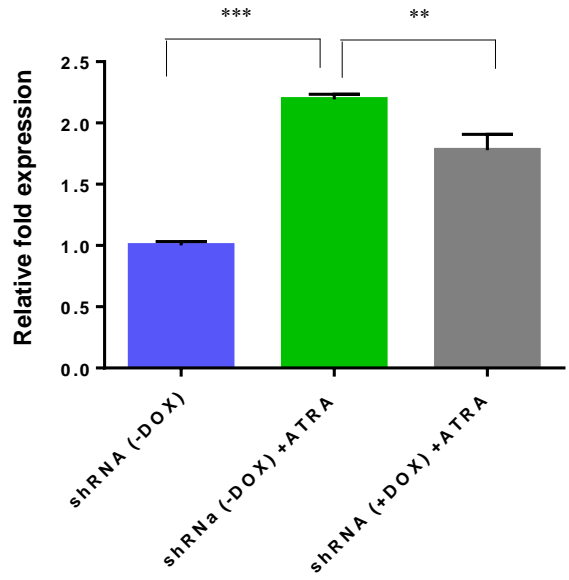

**CD24-day 4**

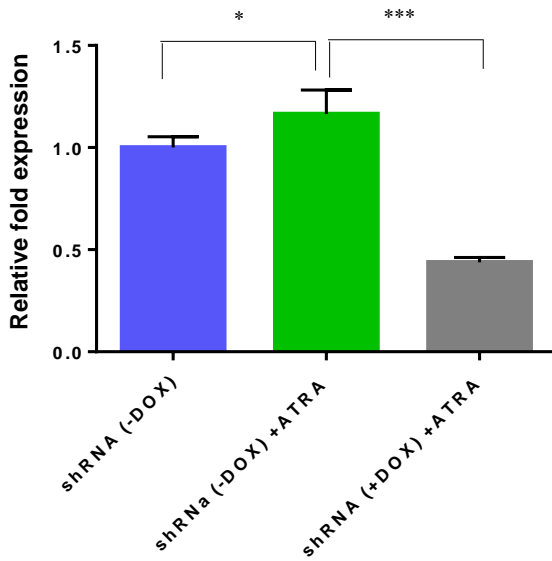

**CD24-day 7**

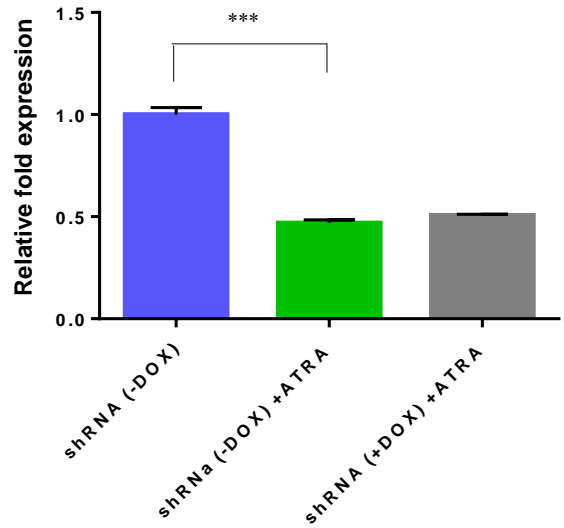

Supplement: MOESM7 [file 12072038]
